# Supplementary material for: Reactivity difference in the oxidative nucleophilic reaction of peroxonickel(iii) intermediates with open-chain and macrocyclic systems
Source: Royal Society of Chemistry journal article supplement (doi:10.1039/c9qi00465c), 2019-01-01
Supplement: c9qi00465c1.pdf [file c9qi00465c1.pdf]

## Electronic Supplementary Information

### Reactivity Difference in Oxidative Nucleophilic Reaction of Peroxonickel(III) Intermediates with Open-Chain and Macrocyclic Ligands

Seonggeun Yun,<sup>‡a</sup> Nam Kwon,<sup>‡a</sup> Seonghan Kim,<sup>a</sup> Donghyun Jeong,<sup>a</sup> Takehiro Ohta,<sup>b,c</sup> and Jaeheung Cho<sup>\*a</sup>

<sup>a</sup>*Department of Emerging Materials Science, DGIST, Daegu 42988, Korea*

<sup>b</sup>*Picobiology Institute, Graduate School of Life Science, University of Hyogo, RSC-UHLP Center, Hyogo 679-5148,  
Japan*

<sup>c</sup>*Present Address: Department of Applied Chemistry, Faculty of Engineering, Sanyo-Onoda City University, Sanyo-  
Onoda, Yamaguchi 756-0884, Japan*

<sup>‡</sup> *These authors contributed equally to this work.*

<sup>\*</sup>Corresponding author: [jaeheung@dgist.ac.kr](mailto:jaeheung@dgist.ac.kr)

## Experimental Section

**Materials and Instrumentation.** All chemicals obtained from Aldrich Chemical Co. were the best available purity and used without further purification unless otherwise indicated. The solvents acetonitrile (CH<sub>3</sub>CN) and diethyl ether (Et<sub>2</sub>O) were passed through solvent purification columns (JC Meyer Solvent Systems) prior to use. H<sub>2</sub><sup>18</sup>O<sub>2</sub> (95% <sup>18</sup>O-enriched, 2.2% H<sub>2</sub><sup>18</sup>O<sub>2</sub> in water) was purchased from ICON Services Inc. (Summit, NJ, USA).

UV-vis spectra were recorded on a Hewlett Packard 8453 diode array spectrophotometer equipped with a UNISOKU Scientific Instruments for low-temperature experiments or with a circulating water bath. Electrospray ionization mass spectra (ESI-MS) were collected on a Waters (Milford, MA, USA) Acquity SQD quadrupole Mass instrument, by infusing samples directly into the source using a manual method. The spray voltage was set at 2.5 kV and the capillary temperature at 80 °C. Resonance Raman spectra were obtained using a liquid nitrogen cooled CCD detector (CCD-1024×256-OPEN-1LS, HORIBA Jobin Yvon) attached to a 1-m single polychromator (MC-100DG, Ritsu Oyo Kogaku) with a 1200 grooves/mm holographic grating. An excitation wavelength of 441.6-nm was provided by a He-Cd laser (Kimmon Koha, IK5651R-G and KR1801C), with 20 mW power at the sample point. All measurements were carried out with a spinning cell at –60 °C. Crystallographic analysis was conducted with an SMART APEX II CCD equipped with a Mo X-ray tube at CCRF in DGIST. EPR spectra were also recorded at 77 K with the use of a JEOL X-band spectrometer (JES-FA200) at CCRF in DGIST. Product analysis was performed on a Thermo Fisher Trace 1310 gas chromatograph (GC) system equipped with a flame ionization detector (FID) and mass spectrometer (GC-MS).

### Preparation of Complexes

**[Ni(Me<sub>6</sub>-trien)](ClO<sub>4</sub>)<sub>2</sub>.** To an acetone solution (2 mL) of Ni(ClO<sub>4</sub>)<sub>2</sub>·6H<sub>2</sub>O (0.37 g, 1 mmol), a acetone solution (2 mL) of Me<sub>6</sub>-trien (0.23 g, 1 mmol) was added slowly. The mixture was stirred for overnight. The solvents were removed under vacuum to yield pink powder, which was recrystallized from acetone/Et<sub>2</sub>O solution as a red product. Yield: 0.46 g (95%). UV-vis (acetone): λ<sub>max</sub> (ε) = 500 nm (100 M<sup>–1</sup> cm<sup>–1</sup>). ESI-MS (acetone): *m/z* = 144.2 for [Ni(Me<sub>6</sub>-trien)]<sup>2+</sup>. Anal. Calcd for C<sub>12</sub>H<sub>30</sub>Cl<sub>2</sub>N<sub>4</sub>NiO<sub>8</sub>: C, 29.54; H, 6.20; N, 11.48. Found: C, 29.49; H, 6.53; N, 11.08. X-ray crystallographically suitable crystals were obtained by slow diffusion of Et<sub>2</sub>O into acetone solution of [Ni(Me<sub>6</sub>-trien)](ClO<sub>4</sub>)<sub>2</sub> in the presence of NaBPh<sub>4</sub>.

**[Ni(Me<sub>6</sub>-trien)(NO<sub>3</sub>)](BPh<sub>4</sub>).** To an acetone solution (2 mL) of Ni(NO<sub>3</sub>)<sub>2</sub>·6H<sub>2</sub>O (0.29 g, 1 mmol), a acetone solution (2 mL) of Me<sub>6</sub>-trien (0.23 g, 1 mmol) was added slowly. The mixture was stirred for overnight. The solvents were removed under vacuum to yield green powder, which was recrystallized from acetone/Et<sub>2</sub>O solution as a green product. X-ray crystallographically suitable crystals were obtained by slow diffusion of Et<sub>2</sub>O into acetone solution of the green product in the presence of NaBPh<sub>4</sub>.

Crystalline yield: 0.44 g (65%). UV-vis (acetone):  $\lambda_{\text{max}}$  ( $\epsilon$ ) = 390 nm (46 M<sup>-1</sup> cm<sup>-1</sup>), 630 nm (24 M<sup>-1</sup> cm<sup>-1</sup>), 1040 nm (14 M<sup>-1</sup> cm<sup>-1</sup>). ESI-MS (acetone):  $m/z$  = 350.2 for [Ni(Me<sub>6</sub>-trien)(NO<sub>3</sub>)]<sup>+</sup>. Anal. Calcd for C<sub>36</sub>H<sub>50</sub>BN<sub>5</sub>NiO<sub>3</sub>: C, 64.50; H, 7.52; N, 10.45. Found: C, 64.30; H, 7.56; N, 10.45.

**[Ni(12-TMC)(NO<sub>3</sub>)](BPh<sub>4</sub>)(H<sub>2</sub>O).** To an CH<sub>3</sub>CN solution (2 mL) of Ni(NO<sub>3</sub>)<sub>2</sub>·6H<sub>2</sub>O (0.29 g, 1 mmol), a CH<sub>3</sub>CN solution (2 mL) of 12-TMC (0.23 g, 1 mmol) was added slowly. The mixture was refluxed for overnight. The solvents were removed under vacuum to yield blue powder, which was recrystallized from CH<sub>3</sub>CN/Et<sub>2</sub>O solution as a blue product. X-ray crystallographically suitable crystals were obtained by slow diffusion of Et<sub>2</sub>O into CH<sub>3</sub>CN solution of the blue product in the presence of NaBPh<sub>4</sub>. Crystalline yield: 0.27 g (41%). UV-vis (acetone):  $\lambda_{\text{max}}$  ( $\epsilon$ ) = 375 nm (56 M<sup>-1</sup> cm<sup>-1</sup>), 590 nm (35 M<sup>-1</sup> cm<sup>-1</sup>), 970 nm (34 M<sup>-1</sup> cm<sup>-1</sup>). ESI-MS (acetone):  $m/z$  = 348.2 for [Ni(12-TMC)(NO<sub>3</sub>)]<sup>+</sup>. Anal. Calcd for C<sub>36</sub>H<sub>50</sub>BN<sub>5</sub>NiO<sub>4</sub>: C, 63.00; H, 7.34; N, 10.20. Found: C, 62.74; H, 6.90; N, 10.26.

**Table S1.** Crystal data and structure refinement for [Ni(Me<sub>6</sub>-trien)](ClO<sub>4</sub>)(BPh<sub>4</sub>)((CH<sub>3</sub>)<sub>2</sub>CO), [Ni(Me<sub>6</sub>-trien)(NO<sub>3</sub>)](BPh<sub>4</sub>) and [Ni(12-TMC)(NO<sub>3</sub>)](BPh<sub>4</sub>)

|                                                     | [Ni(Me <sub>6</sub> -trien)](ClO <sub>4</sub> )(BPh <sub>4</sub> )((CH <sub>3</sub> ) <sub>2</sub> CO) | [Ni(Me <sub>6</sub> -trien)(NO <sub>3</sub> )](BPh <sub>4</sub> )  | [Ni(12-TMC)(NO <sub>3</sub> )](BPh <sub>4</sub> )                   |
|-----------------------------------------------------|--------------------------------------------------------------------------------------------------------|--------------------------------------------------------------------|---------------------------------------------------------------------|
| Empirical formula                                   | C <sub>39</sub> H <sub>56</sub> BClNiN <sub>4</sub> O <sub>5</sub>                                     | C <sub>36</sub> H <sub>50</sub> BN <sub>5</sub> NiO <sub>3</sub>   | C <sub>36</sub> H <sub>48</sub> BNiN <sub>5</sub> O <sub>3</sub>    |
| Formula weight                                      | 765.84                                                                                                 | 670.33                                                             | 668.31                                                              |
| Temperature (K)                                     | 133(2)                                                                                                 | 133(2)                                                             | 143(2)                                                              |
| Wavelength (Å)                                      | 0.71073                                                                                                | 0.71073                                                            | 0.71073                                                             |
| Crystal system/space group                          | orthorhombic, <i>Pna</i> 2 <sub>1</sub>                                                                | Monoclinic, <i>P</i> 2 <sub>1</sub> / <i>c</i>                     | orthorhombic, <i>Pna</i> 2 <sub>1</sub>                             |
| Unit cell dimensions                                |                                                                                                        |                                                                    |                                                                     |
| <i>a</i> (Å)                                        | 35.547(2)                                                                                              | 11.6991(7)                                                         | 29.560(3)                                                           |
| <i>b</i> (Å)                                        | 11.6830(7)                                                                                             | 9.8702(6)                                                          | 11.5592(14)                                                         |
| <i>c</i> (Å)                                        | 9.2810(6)                                                                                              | 30.3175(16)                                                        | 9.7924(11)                                                          |
| <i>α</i> (°)                                        | 90.00                                                                                                  | 90.00                                                              | 90.00                                                               |
| <i>β</i> (°)                                        | 90.00                                                                                                  | 97.873(2)                                                          | 90.00                                                               |
| <i>γ</i> (°)                                        | 90.00                                                                                                  | 90.00                                                              | 90.00                                                               |
| Volume (Å <sup>3</sup> )                            | 3454.4(3)                                                                                              | 3467.8(3)                                                          | 3346.0(6)                                                           |
| <i>Z</i>                                            | 4                                                                                                      | 4                                                                  | 4                                                                   |
| Calculated density (g/cm <sup>-3</sup> )            | 1.320                                                                                                  | 1.284                                                              | 1.327                                                               |
| Absorption coefficient (mm <sup>-1</sup> )          | 0.620                                                                                                  | 0.602                                                              | 0.624                                                               |
| Reflections collected                               | 167965                                                                                                 | 161772                                                             | 155805                                                              |
| Independent reflections [ <i>R</i> (int)]           | 9597 [0.1506]                                                                                          | 8706 [0.0822]                                                      | 8401 [0.1668]                                                       |
| Refinement method                                   | Full-matrix least-squares on <i>F</i> <sup>2</sup>                                                     | Full-matrix least-squares on <i>F</i> <sup>2</sup>                 | Full-matrix least-squares on <i>F</i> <sup>2</sup>                  |
| Data/restraints/parameters                          | 9597/1/469                                                                                             | 8706/0/422                                                         | 8401/1/419                                                          |
| Goodness-of-fit on <i>F</i> <sup>2</sup>            | 1.146                                                                                                  | 1.094                                                              | 0.973                                                               |
| Final <i>R</i> indices [ <i>I</i> > 2σ( <i>I</i> )] | <i>R</i> <sub>1</sub> = 0.0725<br><i>wR</i> <sub>2</sub> = 0.1426                                      | <i>R</i> <sub>1</sub> = 0.0644,<br><i>wR</i> <sub>2</sub> = 0.1457 | <i>R</i> <sub>1</sub> = 0.0549,<br><i>wR</i> <sub>2</sub> = 0.1267  |
| <i>R</i> indices (all data)                         | <i>R</i> <sub>1</sub> = 0.1039,<br><i>wR</i> <sub>2</sub> = 0.1546                                     | <i>R</i> <sub>1</sub> = 0.0896,<br><i>wR</i> <sub>2</sub> = 0.1341 | <i>R</i> <sub>1</sub> = 0.0881,<br><i>wR</i> <sub>2</sub> = 0.16432 |

**Table S2.** Selected bond distances (Å) and angles (°) for [Ni(Me<sub>6</sub>-trien)](ClO<sub>4</sub>)(BPh<sub>4</sub>)((CH<sub>3</sub>)<sub>2</sub>CO), [Ni(Me<sub>6</sub>-trien)(NO<sub>3</sub>)](BPh<sub>4</sub>) and [Ni(12-TMC)(NO<sub>3</sub>)](BPh<sub>4</sub>)

| Bond Distances (Å)                                                                                     |           |                                                                   |            |                                                   |            |
|--------------------------------------------------------------------------------------------------------|-----------|-------------------------------------------------------------------|------------|---------------------------------------------------|------------|
| [Ni(Me <sub>6</sub> -trien)](ClO <sub>4</sub> )(BPh <sub>4</sub> )((CH <sub>3</sub> ) <sub>2</sub> CO) |           | [Ni(Me <sub>6</sub> -trien)(NO <sub>3</sub> )](BPh <sub>4</sub> ) |            | [Ni(12-TMC)(NO <sub>3</sub> )](BPh <sub>4</sub> ) |            |
| Ni-N1                                                                                                  | 1.944(5)  | Ni-O1                                                             | 2.151(2)   | Ni-O1                                             | 2.141(4)   |
| Ni-N2                                                                                                  | 1.925(4)  | Ni-O2                                                             | 2.117(2)   | Ni-O2                                             | 2.143(4)   |
| Ni-N3                                                                                                  | 1.928(5)  | Ni-N1                                                             | 2.158(3)   | Ni-N1                                             | 2.134(3)   |
| Ni-N4                                                                                                  | 2.003(6)  | Ni-N2                                                             | 2.078(3)   | Ni-N2                                             | 2.084(4)   |
|                                                                                                        |           | Ni-N3                                                             | 2.200(3)   | Ni-N3                                             | 2.131(4)   |
|                                                                                                        |           | Ni-N4                                                             | 2.148(3)   | Ni-N4                                             | 2.085(5)   |
| Bond Angles (°)                                                                                        |           |                                                                   |            |                                                   |            |
| [Ni(Me <sub>6</sub> -trien)](ClO <sub>4</sub> )(BPh <sub>4</sub> )((CH <sub>3</sub> ) <sub>2</sub> CO) |           | [Ni(Me <sub>6</sub> -trien)(NO <sub>3</sub> )](BPh <sub>4</sub> ) |            | [Ni(12-TMC)(NO <sub>3</sub> )](BPh <sub>4</sub> ) |            |
| N1-Ni-N2                                                                                               | 86.80(2)  | O1-Ni-O2                                                          | 60.71(8)   | O1-Ni-O2                                          | 60.23(13)  |
| N1-Ni-N3                                                                                               | 162.0(2)  | N1-Ni-N2                                                          | 85.19(10)  | N1-Ni-N2                                          | 84.55(18)  |
| N1-Ni-N4                                                                                               | 102.9(3)  | N1-Ni-N3                                                          | 166.82(9)  | N1-Ni-N3                                          | 160.34(14) |
| N2-Ni-N3                                                                                               | 87.66(19) | N1-Ni-N4                                                          | 88.08(13)  | N1-Ni-N4                                          | 84.34(19)  |
| N2-Ni-N4                                                                                               | 161.4(3)  | N2-Ni-N3                                                          | 83.44(10)  | N2-Ni-N3                                          | 83.88(18)  |
| N3-Ni-N4                                                                                               | 87.4(3)   | N2-Ni-N4                                                          | 109.23(11) | N2-Ni-N4                                          | 109.18(15) |
|                                                                                                        |           | N3-Ni-N4                                                          | 101.94(13) | N3-Ni-N4                                          | 84.53(19)  |
|                                                                                                        |           | Ni-O1-N5                                                          | 91.36(16)  | Ni-O1-N5                                          | 92.1 (3)   |
|                                                                                                        |           | Ni-O2-N5                                                          | 92.37(17)  | Ni-O2-N5                                          | 91.8 (3)   |

**Table S3.** Selected DFT parameters for [Ni(Me<sub>6</sub>-trien)(O<sub>2</sub>)]<sup>+</sup> (**1**) and [Ni(12-TMC)(O<sub>2</sub>)]<sup>+</sup> (**2**)

| Bond Distances (Å) |       |          |       |
|--------------------|-------|----------|-------|
| <b>1</b>           |       | <b>2</b> |       |
| Ni-O1              | 1.88  | Ni-O1    | 1.89  |
| Ni-O2              | 1.93  | Ni-O2    | 1.89  |
| Ni-N1              | 2.22  | Ni-N1    | 2.21  |
| Ni-N2              | 2.10  | Ni-N2    | 2.05  |
| Ni-N3              | 2.25  | Ni-N3    | 2.22  |
| Ni-N4              | 2.09  | Ni-N4    | 2.06  |
| O1-O2              | 1.40  | O1-O2    | 1.40  |
| Bond Angles (°)    |       |          |       |
| <b>1</b>           |       | <b>2</b> |       |
| O1-Ni-O2           | 43.0  | O1-Ni-O2 | 43.5  |
| N1-Ni-N2           | 83.2  | N1-Ni-N2 | 84.0  |
| N1-Ni-N3           | 164.2 | N1-Ni-N3 | 159.3 |
| N1-Ni-N4           | 85.9  | N1-Ni-N4 | 84.4  |
| N2-Ni-N3           | 82.5  | N2-Ni-N3 | 84.2  |
| N2-Ni-N4           | 113.2 | N2-Ni-N4 | 109.8 |
| N3-Ni-N4           | 106.2 | N3-Ni-N4 | 83.8  |

**Table S4.** Mulliken spin density on Ni(O<sub>Total</sub>)<sup>a</sup> of [Ni(Me<sub>6</sub>-trien)(O<sub>2</sub>)]<sup>+</sup> (**1**) and [Ni(12-TMC)(O<sub>2</sub>)]<sup>+</sup> (**2**).

| Model complex | <b>1</b>    | <b>2</b>   | <b>3</b>    |
|---------------|-------------|------------|-------------|
| <b>1</b>      | 36.0 (51.4) | 64.5 (5.0) | 47.9 (38.0) |
| <b>2</b>      | 36.1 (51.4) | 65.8 (2.1) | 46.2 (40.7) |

<sup>a</sup>1, 2 and 3 represent the electron density composition of the  $\alpha$ -LUMO,  $\beta$ -LUMO and  $\beta$ -LUMO+1 orbitals, respectively.

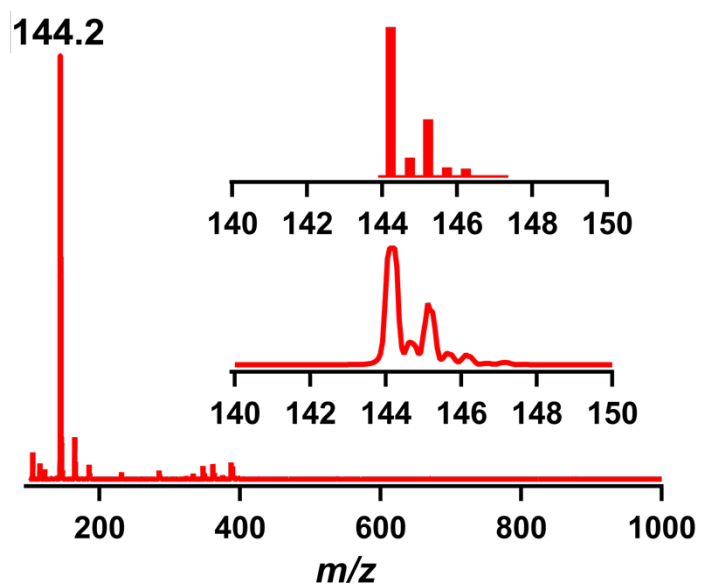

**Fig. S1.** ESI-MS spectrum of  $[\text{Ni}(\text{Me}_6\text{-trien})](\text{ClO}_4)_2$  in acetone. Mass peak at  $m/z = 144.2$  is assigned to  $[\text{Ni}(\text{Me}_6\text{-trien})]^{2+}$  (calcd.  $m/z = 144.2$ ). The inset shows the simulated (upper) and experimental (lower) isotope distribution patterns of the peak at  $m/z = 144.2$ .

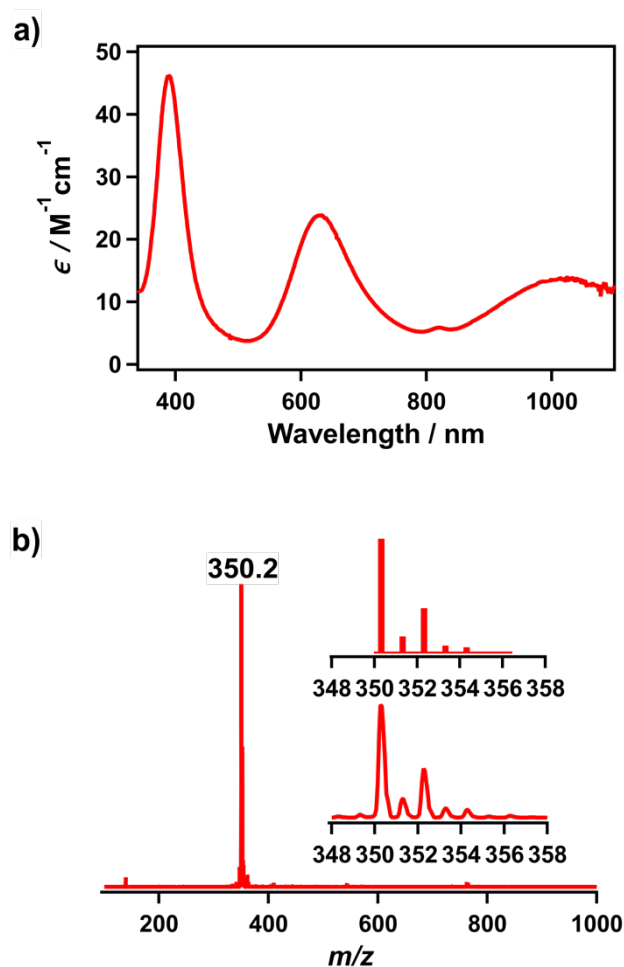

**Fig. S2.** (a) UV-vis spectrum of  $[\text{Ni}(\text{Me}_6\text{-trien})(\text{NO}_3)]^+$  in acetone at  $-40\text{ }^\circ\text{C}$ . (b) ESI-MS spectrum of  $[\text{Ni}(\text{Me}_6\text{-trien})(\text{NO}_3)]^+$  in acetone. Mass peak at  $m/z = 350.2$  is assigned to  $[\text{Ni}(\text{Me}_6\text{-trien})(\text{NO}_3)]^+$  (calcd.  $m/z = 350.2$ ). The inset shows the simulated (upper) and experimental (lower) isotope distribution patterns of the peak at  $m/z = 350.2$ .

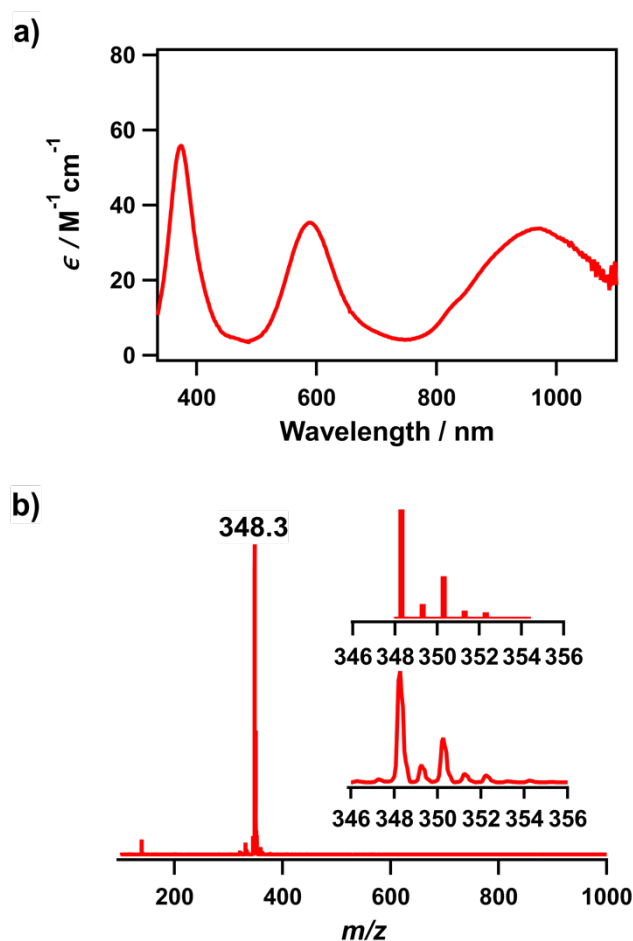

**Fig. S3.** (a) UV-vis spectrum of  $[\text{Ni}(\text{12-TMC})(\text{NO}_3)]^+$  in acetone at  $-40^\circ \text{C}$ . (b) ESI-MS spectrum of  $[\text{Ni}(\text{12-TMC})(\text{NO}_3)]^+$  in acetone. Mass peak at  $m/z = 348.3$  is assigned to  $[\text{Ni}(\text{12-TMC})(\text{NO}_3)]^+$  (calcd.  $m/z = 348.3$ ). The inset shows the simulated (upper) and experimental (lower) isotope distribution patterns of the peak at  $m/z = 348.3$ .

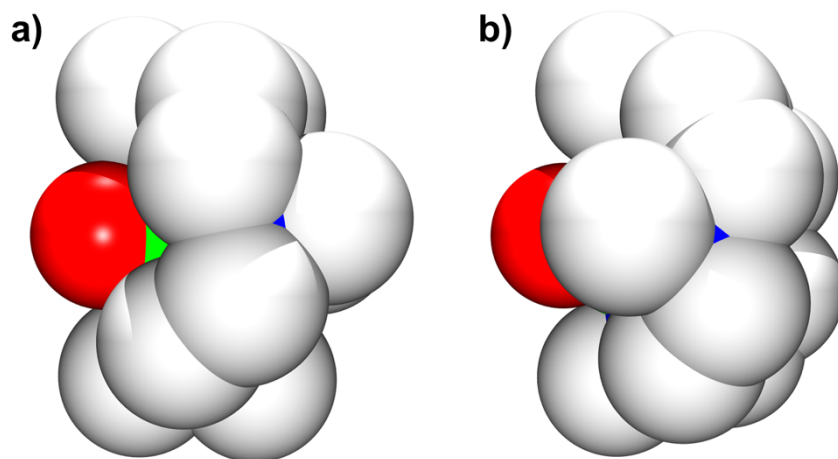

**Fig. S4.** Space-filling diagrams for the DFT-optimized structures of (a) [Ni(Me<sub>6</sub>-trien)(O<sub>2</sub>)]<sup>+</sup> (**1**) and (b) [Ni(12-TMC)(O<sub>2</sub>)]<sup>+</sup> (**2**) (gray, C; blue, N; red, O; green, Ni). Hydrogen atoms are omitted for clarity.

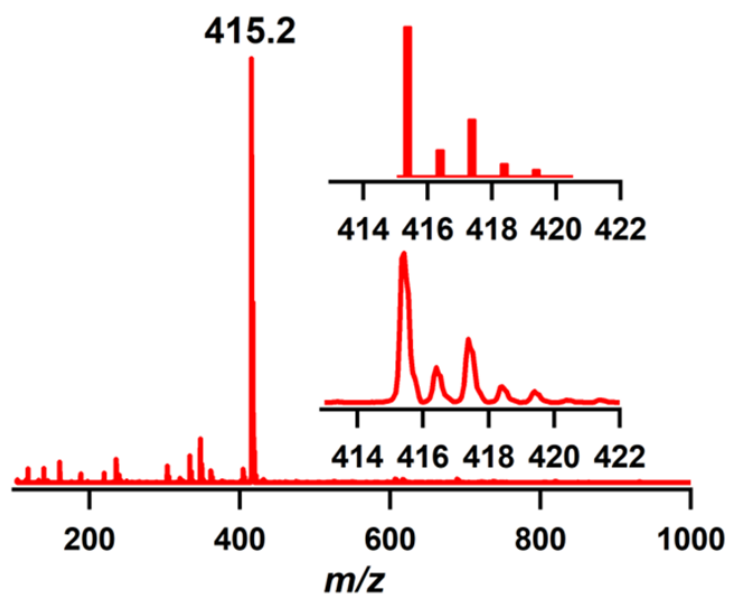

**Fig. S5.** ESI-MS spectrum taken after the completion of the reaction. Mass peak at  $m/z = 415.2$  is assigned to  $[\text{Ni}(\text{Me}_6\text{-trien})(\text{HCOO})]^+$ . The inset shows the simulated (upper) and experimental (lower) isotope distribution patterns of the peak at  $m/z = 415.2$ .

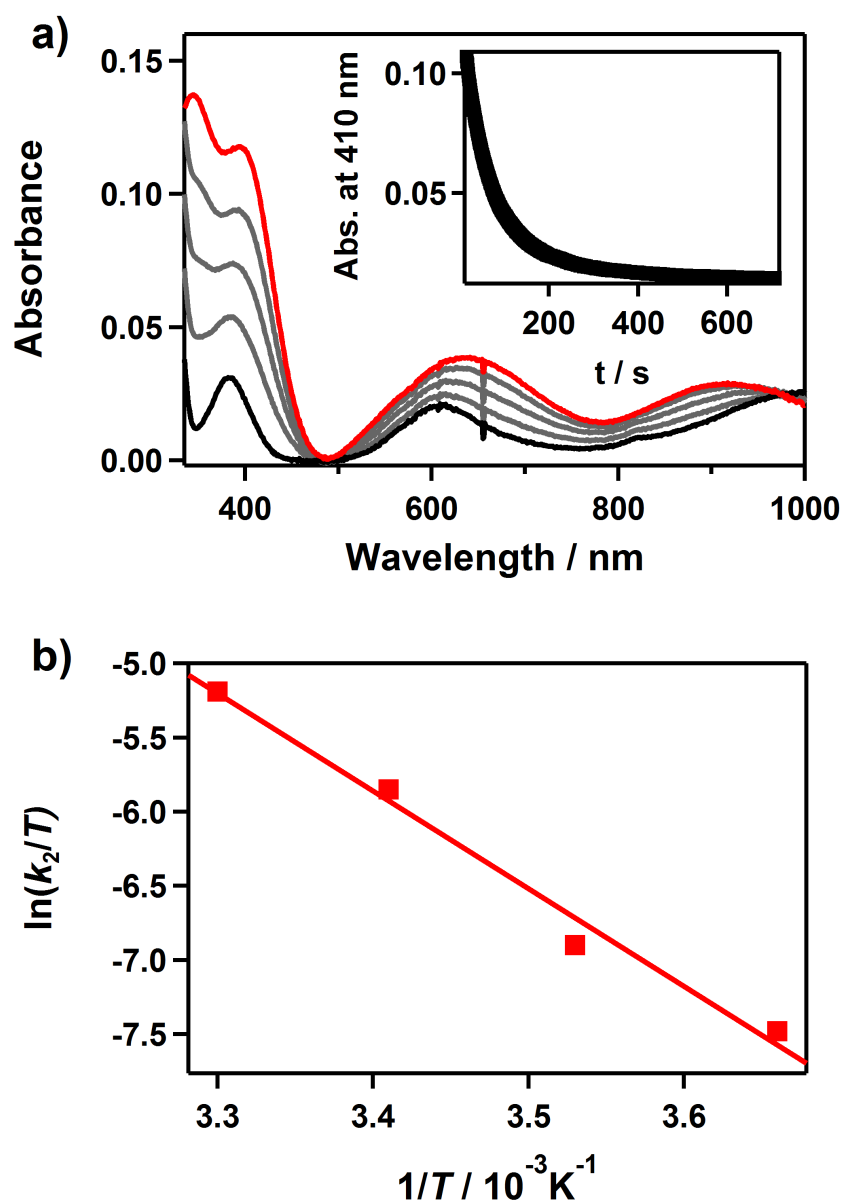

**Fig. S6.** Reactions of  $[\text{Ni}(\text{12-TMC})(\text{O}_2)]^+$  (**2**) with cyclohexylcarboxaldehyde (CCA). (a) UV-vis spectral changes of **2** (2 mM) upon addition of 40 equiv of CCA at 10 °C. Inset shows the time course of the absorbance at 410 nm (black). (b) Plot of first-order rate constants against  $1/T$  to determine activation parameters.

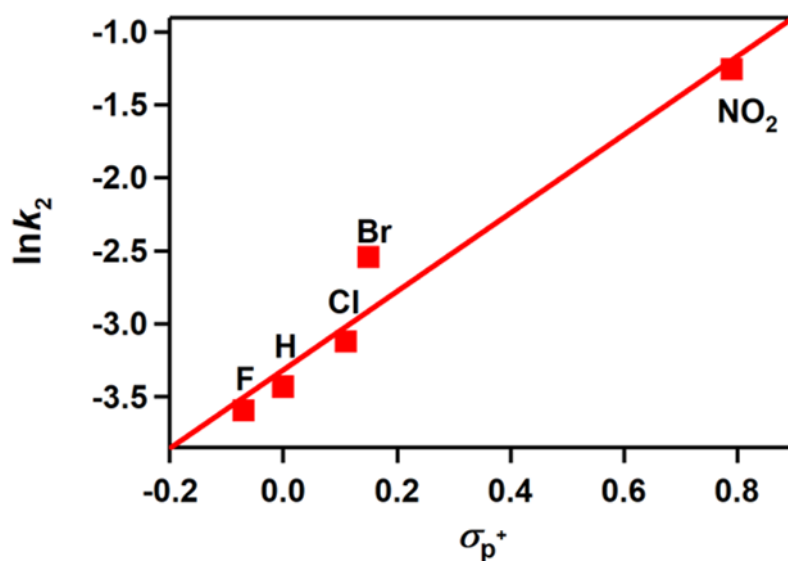

**Fig. S7.** Hammett plot of  $\ln k_2$  against  $\sigma_p^+$  of benzoyl chloride derivatives in the reaction of  $[\text{Ni}(\text{12-TMC})(\text{O}_2)]^+$  (**2**) with *para*-substituted benzoyl chloride, *para*-X-Ph-COCl (X = F, H, Cl, Br, NO<sub>2</sub>) in acetone at 10 °C.

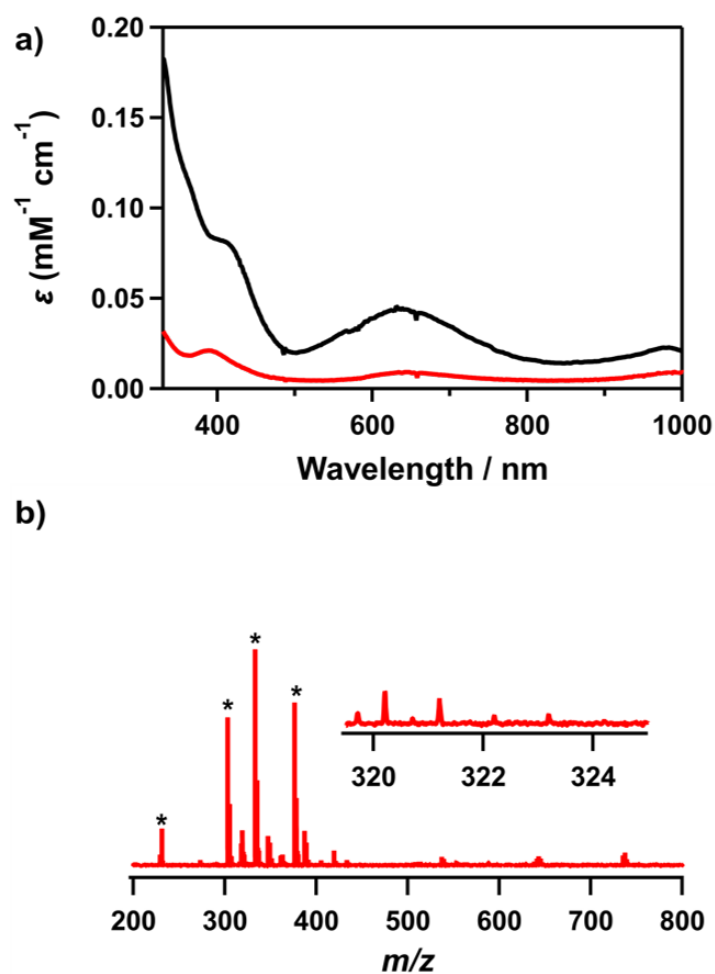

**Fig. S8.** (a) UV-vis spectra showing the formation of **1** in the reaction  $[\text{Ni}(\text{Me}_6\text{-trien})(\text{NO}_3)]^+$  (2 mM; black line and 32 mM; red line) with 10 equiv of  $\text{H}_2\text{O}_2$  and 5 equiv TEA in the presence of  $\text{H}_2\text{O}$  (9 M) in acetone at  $-50\text{ }^\circ\text{C}$ . (b) CSI-MS spectrum of the reaction solution obtained in the reaction of  $[\text{Ni}(\text{Me}_6\text{-trien})(\text{NO}_3)]^+$  with 10 equiv of  $\text{H}_2\text{O}_2$  and 5 equiv TEA in the presence of  $\text{H}_2\text{O}$  (9 M) acetone at  $-50\text{ }^\circ\text{C}$ . Asterisks are some unidentified species. The inset shows the expansion from 318 to 325  $m/z$ .
